# Supplementary material for: Short-Chain Fatty Acids Suppress mTOR Signaling in Colon Cancer Cells via Long Non-Coding RNA RMST
Source: MDPI journal article supplement (doi:10.3390/kinasesphosphatases2020008), 2024-04-01
Supplement: s1 [file kinasesphosphatases-2876857-supplementary.pdf › kinasesphosphatases-2876857-supplementary.pdf]

**Table S1.** The effects of propionate on the expression of 83 lncRNAs array in HCT116 cell.

| lncRNA     | fold change | lncRNA           | fold change | lncRNA             | fold change |
|------------|-------------|------------------|-------------|--------------------|-------------|
| 21A        | 0.94        | HOXA1AS AA489505 | 0.80        | PCGEM1             | 3.50        |
| AAA1       | 1.05        | HOXA3AS BI823151 | 1.01        | PR-AT2             | 2.34        |
| aHIF       | 1.86        | HOXA3AS BE873349 | 0.61        | PRINS              | 0.98        |
| AK023948   | 0.77        | HOXA6AS AK092154 | 1.06        | PSF inhibiting RNA | 0.49        |
| ANRIL      | 0.46        | HOXA11AS         | 0.92        | PTENP1             | 2.28        |
| Anti-NOS2A | 0.58        | HULC             | 3.80        | RMRP               | 1.22        |
| BACE1AS    | 1.10        | IPW              | 0.67        | ROR                | 0.53        |
| BC017743   | 0.90        | IGF2AS           | 1.28        | Saf                | 0.74        |
| BC043430   | 0.92        | KRAS P1          | 1.41        | SCA8               | 0.75        |
| BC200      | 1.25        | l1pa16           | 0.75        | SOX2OT             | 0.70        |
| BCMS       | 1.15        | LIT              | 2.61        | SRA                | 1.10        |
| BIC        | 1.32        | LOC285194        | 0.86        | ST7OT1             | 0.74        |
| CCND1ANCR  | 1.05        | LUST             | 1.05        | ST7OT2             | 2.34        |
| CMPD       | 0.59        | LincRNA-VLDLR    | 1.09        | ST7OT3             | 1.30        |
| DD3        | 9.36        | LincRNA-SFMBT2   | 0.57        | ST7OT4             | 0.78        |
| DGCR5      | 0.92        | MALAT1           | 6.44        | Telomerase RNA     | 1.09        |
| DISC2      | 1.62        | MEG3             | 20.06       | TMEVPG1            | 0.67        |
| DLG2AS     | 0.45        | MER11C           | 0.95        | TU_0017629         | 0.78        |
| EGO        | 1.32        | NEAT1            | 5.34        | TUG                | 1.19        |
| GAS5       | 1.52        | NCRMS            | 62.96       | UCA1               | 0.62        |
| GOMAFU     | 1.24        | NDM29            | 0.79        | WT-1AS             | 0.59        |
| H19        | 1.08        | PANDA            | 1.00        | Y1                 | 1.64        |
| H19-AS     | 0.74        | PAR5             | 1.02        | Y3                 | 0.94        |
| HAR1A      | 1.14        | PCAT-1           | 0.71        | Y4                 | 1.17        |
| HAR1B      | 3.31        | PCAT-14          | 0.65        | Y5                 | 1.48        |
| HOTAIR     | 0.56        | PCAT-29          | 31.26       | ZEB2NAT            | 0.61        |
| HOTAIRM1   | 1.97        | PCAT-32          | 0.96        | 7SK                | 1.64        |
| HOTTIP     | 1.99        | PCAT-43          | 0.56        |                    |             |

**Table S2.** Sequence of real-time PCR primers for mTOR regulator, and the effects of RMST on the expression of mTOR regulator.

| mTOR regulator      | forward primer               | reverse primer               | fold change |
|---------------------|------------------------------|------------------------------|-------------|
| AKT1                | TCCTCCTCAAGAATGATGGCA        | GTGCGTTCGATGACAGTGGT         | 1.23        |
| AKT2                | AGGCACGGGCTAAAGTGAC          | CTGTGTGAGCGACTTCATCCT        | 2.12        |
| AKT3                | AATGGACAGAAGCTATCCAGGC       | TGATGGGTGTGTAGAGGCATCC       | 1.10        |
| HRAS                | GACGTGCCTGTTGGACATC          | CTTCACCCGTTTGATCTGCTC        | 1.39        |
| IGF1                | GCTCTTCAGTTCGTGTGTGGA        | GCCTCCTTAGATCACAGCTCC        | 1.19        |
| IKKB (IKK $\beta$ ) | GTCTTTGCACATCATTCGTGGG       | GTGCCGAAGCTCCAGTAGTC         | 1.35        |
| INS                 | GCAGCCTTTGTGAACCAACAC        | CCCCGCACACTAGGTAGAGA         | NA          |
| INSR                | AAAACGAGGCCCGAAGATTTC        | GAGCCCATAGACCCGGAAG          | 1.55        |
| IRS1                | CCCAGGACCCGCATTCAAA          | GGCGGTAGATACCAATCAGGT        | 1.94        |
| MAPK1 (ERK2)        | TCACACAGGGTTCCTGACAGA        | ATGCAGCCTACAGACCAAATATC      | 1.26        |
| MAPK3 (ERK1)        | CTACACGCAGTTGCAGTACAT        | CAGCAGGATCTGGATCTCCC         | 1.42        |
| PDPK1               | TTCCGAGCTGGAACGAGTAT         | GGTCTCTTGCCTTAGGGAAGAA       | 1.14        |
| PIK3C3 (Vps34)      | GTCTGGCCTAATGTAGAAGCAG       | GGCAAGACGGCTCATCTGAT         | 1.18        |
| PIK3CA (p110-alpha) | CCACGACCATCATCAGGTGAA        | CCTCACGGAGGCATTCTAAAGT       | 1.49        |
| PIK3CB              | CTGCCTGCGACAGATGAGTG         | TCCGATTACCAAGTGCTCTTTC       | 1.34        |
| PIK3CD              | TCAACTCACAGATCAGCCTCC        | CGCGAAAGTCGTTCACTTCT         | 1.41        |
| PIK3CG              | AACACCGACCTCACAGTTTTT        | CTCAAGCCACACATTCCACAG        | NA          |
| PLD1                | CCCAGCGATCCCAAGATACAA        | GACAGCCGGAGAGATACGTCT        | 1.34        |
| PLD2                | ACTCACGGCGACTTTTCTCTG        | AACGGCAAATCGAGCCAGA          | 1.22        |
| RHEB                | TTGTGGACTCCTACGATCCAA        | GGCTGTGTCTACAAGTTGAAGAT      | 1.15        |
| RPS6KA1             | CAGTGGGCACCTGTATGCTAT        | ACGAATGGGTGATTTACATCAGC      | 1.33        |
| RPS6KA2             | GCCACCCTAAAAGTTCGGGAC        | TTTCTTCCGTCTGAAAGGCA         | 1.61        |
| RPS6KA5             | AGGCAGTCGCCATTTTTGGTA        | TCTCCAACATAAATCTGCACCTC      | 1.39        |
| RRAGA               | ACACTCCCACGTCCGATTC          | CTCTCCACGTCAAACACGTAA        | 1.14        |
| RRAGB               | GGTGGGCAAGACACCTTCAT         | GCGGCTCTCCACATCAAAGA         | 0.94        |
| RRAGC               | AGGGCCAATGATGACCTTGC         | GTGGAATGAGTTTCTGCACCA        | 1.32        |
| RRAGD               | CTAGCGGACTACGGAGACG          | ATGAGCAGGATTCTCGGCTTC        | 1.22        |
| TELO2               | CCCGCAGAGATCGTGGATG          | CATGTCTAGGGGACAACTC          | 1.17        |
| AKT1S1 (PRAS40)     | CCTCCACGACATCGCACTG          | TCACAAAGAGCCCTCCATTATCA      | 1.88        |
| CAB39               | GCAGCCCATCCTAGACATCC         | TCTTCTCGTCGTTAACTGCTC        | 1.14        |
| CAB39L              | GGCCTGCTAGTGACACTGATA        | TACTCCACAGTAGGACTCCGA        | 1.18        |
| DDIT4 (REDD1)       | TGAGGATGAACACTTGTGTGC        | CCAACTGGCTAGGCATCAGC         | 1.55        |
| DDIT4L (REDD2)      | TGTGGCTATCACCAGAGAG          | TGCTTTGATTTGGACAGACAGT       | 1.35        |
| DEPTOR (DEPDC6)     | TTAGCAGACCGGGCATTATT         | GAAGGTGCCGTCATCCTTTCT        | 0.96        |
| DEPTOR (DEPDC6)     | GCGGAGGCGAAGACTGATG          | GGCTCACTGACATAAAGCTGGTA      | 0.89        |
| FKBP1A (FKBP12)     | CTCCAGATTATGCCTATGGTGC       | AGCTCCACATCGAAGACGAGA        | 0.72        |
| <b>FKBP8</b>        | <b>GACTTCGAGGTACTGGATGGG</b> | <b>CTTCTTCCTCAACAGCCCGTT</b> | <b>5.46</b> |
| IGFBP3              | AGAGCACAGATACCCAGAACT        | GGTGATTCAGTGTGTCTTCCATT      | 1.10        |
| PRKAA1 (AMPK)       | TTGAAACCTGAAAATGTCCTGCT      | GGTGAGCCACAACCTGTTCTT        | 1.27        |
| PRKAA2              | GTGAAGATCGGACACTACGTG        | CTGCCACTTTATGGCCTGTTA        | 1.05        |
| PRKAB1              | CCTCACCAGAAGCCACAATAAC       | CGTCCACTGACCATCCACA          | 1.09        |
| PRKAB2              | CAGTCAGCTTGGCACAATTAAC       | TCCTCAGATCGAAACGCATACA       | 1.28        |
| PRKAG1              | CCACAAGCGCATTTCTGAAGTT       | TGGTAGTGCGAACCATAGCAATA      | 1.24        |
| PRKAG2              | CCAGATGCAAGCCTCTTCGAT        | GATAGGGTCAATAACGGGCAATC      | 1.09        |

|              |                        |                         |      |
|--------------|------------------------|-------------------------|------|
| PRKAG3       | CCTGGGAGTGTGAGCTAGAAG  | GTTTCCGCAGTTCGTCATCC    | NA   |
| PTEN         | AGGGACGAACTGGTGTAATGA  | CTGGTCCTTACTTCCCCATAGAA | 1.35 |
| STK11 (LKB1) | TCTACAACATCACCACGGGTC  | TTCGTACTCAAGCATCCCTTTC  | 1.08 |
| STRADB       | GGTCACGTCCATCCACTAGAG  | ACCAGTGTTCTGTGGGAGTA    | 1.15 |
| TP53 (p53)   | CAGCACATGACGGAGGTTGT   | TCATCCAAATACTCCACACGC   | 1.19 |
| TSC1         | CCATGCTACCAATGATTCCACA | TGATGACAGACGGCCAAAAATG  | 1.28 |
| TSC2         | ATAGCTGTTACCTCGACGAGT  | TGCAGGGAGACCTCTATGTCC   | 4.66 |
| YWHAQ        | AGGGTCATCTCTAGCATCGAG  | CCACTTTCTCCCGATAGTCCTT  | 1.11 |
